# Supplementary material for: A KIT Variant Associated with Increased White Spotting Epistatic to MC1R Genotype in Horses (Equus caballus)
Source: Animals (Basel). 2022 Aug 2;12(15):1958. doi: 10.3390/ani12151958 (PMC9367399; doi:10.3390/ani12151958)
Supplement: Supplementary file 1 [file animals-12-01958-s001.zip]

Archive with 4 entries (4 files):
- File S1.pdf
- File S2.pdf
- Table S1.xlsx
- Table S2.pdf
