# Supplementary material for: A KIT Variant Associated with Increased White Spotting Epistatic to MC1R Genotype in Horses (Equus caballus)
Source: Animals (Basel). 2022 Aug 2;12(15):1958. doi: 10.3390/ani12151958 (PMC9367399; doi:10.3390/ani12151958)

# DUET - Protein Stability Change Upon Mutation

mCSM Predicted Stability Change ( $\Delta\Delta G$ ):

-1.192 kcal/mol (*Destabilizing*)

SDM Predicted Stability Change ( $\Delta\Delta G$ ):

-0.69 kcal/mol (*Destabilizing*)

**DUET** Predicted Stability Change ( $\Delta\Delta G$ ):

-1.193 kcal/mol (*Destabilizing*)

## Mutation:

Wild-type: THR

Position: 391

Mutant-type: ALA

Chain: A

Secondary structure: Loop or irregular

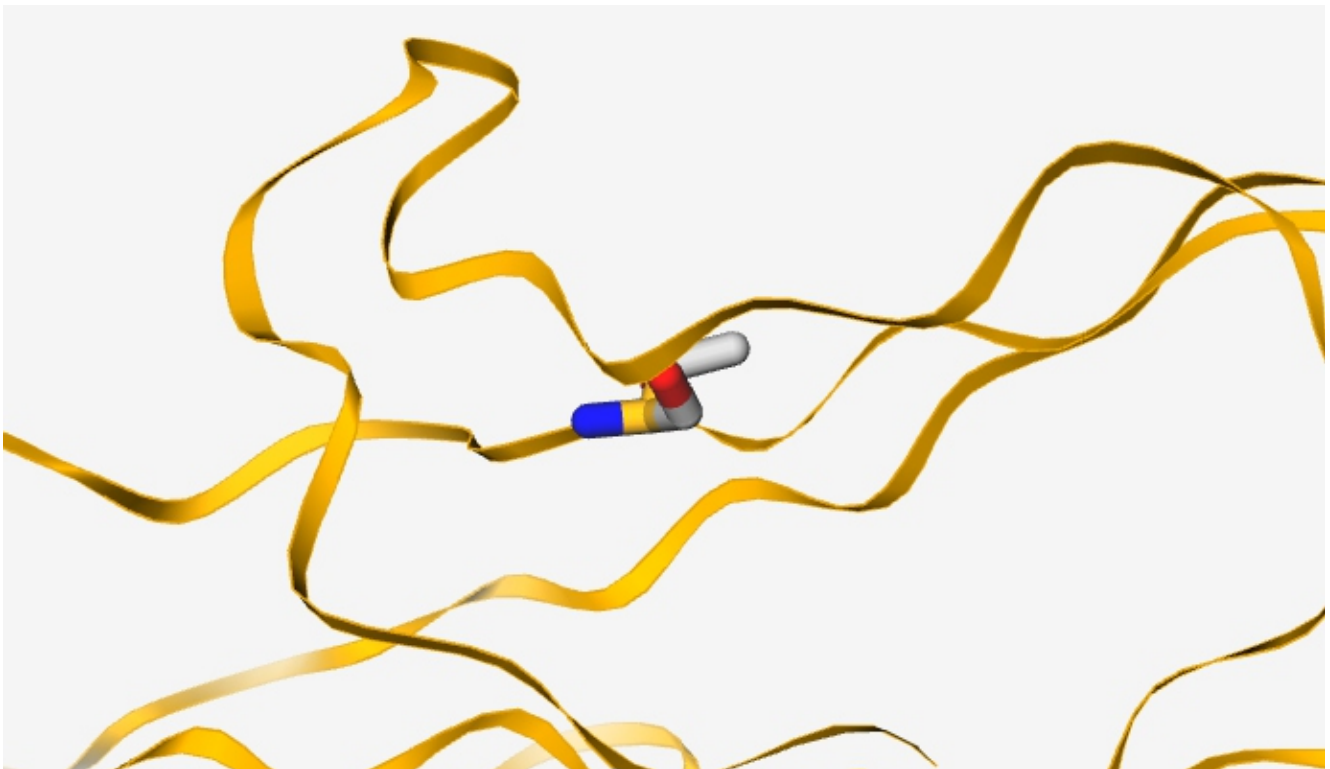

Supplement: Supplementary file 1 [file animals-12-01958-s001.zip › File S1.pdf]
