# Supplementary material for: A KIT Variant Associated with Increased White Spotting Epistatic to MC1R Genotype in Horses (Equus caballus)
Source: Animals (Basel). 2022 Aug 2;12(15):1958. doi: 10.3390/ani12151958 (PMC9367399; doi:10.3390/ani12151958)
Supplement: Supplementary file 1 [file animals-12-01958-s001.zip › Table S1.xlsx]

## Sheet: S1 Table - Details of the Pheno
Supplemental Table 1. Genotypes and AGW phenotypic information for the 147 individuals.
Lab ID	Breed	Leg Average	Body Average	Head Average	Average Grade of White	ASIP Agouti genotype	MC1R Extension genotype	KIT rs1140732842 genotype	MITF rs1148371483 genotype	KIT W19 genotype
EdX2925	Mangalarga	16.6667	1	7.66667	25.3333	A/+	e/e	CC	GG	TT
EdX1476	Arabian	19.3333	0	5.66667	25	A/+	e/e	CC	CG	TT
EdX4328	Arabian	0	0	3	3	A/+	E/+	CC	CC	TT
EdX2446	ArabianX	5	0	3.33333	8.33333	A/+	E/+	CC	CC	TT
EdX3777	Arabian	9.66667	0	6.66667	16.3333	A/+	E/+	CC	CC	TT
EdX3204	Mangalarga	18	2	7.66667	27.6667	A/+	e/e	CC	CG	TT
EdX1842	Arabian	17	1	6.33333	24.3333	A/+	e/e	CC	GG	TT
EdX2506	Arabian	6.66667	1	3.66667	11.3333	a/a	E/+	TC	GG	TT
EdX4220	Arabian	0	0	0	0	A/+	E/+	TC	CC	TT
EdX4673	Warmblood	1.66667	0	1	2.66667	A/+	E/+	TC	CC	TT
EdX3780	Pony	2.66667	0	4.66667	7.33333	A/+	e/e	TC	CC	TT
EdX2325	Arabian	0	0	0.333333	0.333333	a/a	E/+	TC	CC	TT
EdX2922	Warmblood	1	0	4.33333	5.33333	A/+	E/+	TC	CC	TT
EdX3247	Warmblood	4.66667	0	5.66667	10.3333	A/+	E/+	TC	CC	TT
EdX2327	Warmblood	0	0	0.333333	0.333333	A/+	E/+	TC	CG	TT
EdX3572	Warmblood	2	0	0	2	A/+	E/+	TC	CG	TT
EdX2281	Arabian	0.666667	0	1	1.66667	A/+	E/+	TC	GG	TT
EdX4387	Welsh Cob	4.66667	0	3.66667	8.33333	A/+	E/+	TC	CC	TT
EdX1537	Welsh Cob	3	0	2.33333	5.33333	A/+	E/+	TC	CG	TT
EdX2595	Welsh Cob	3	0	4.66667	7.66667	A/+	E/+	TC	CG	TT
EdX4521	Welsh Cob	4.33333	0	1	5.33333	A/+	E/+	TC	GG	TT
EdX1195	Welsh Cob	5	0	2.33333	7.33333	A/+	E/+	TC	CG	TT
EdX1692	Welsh Cob	12.3333	0	3.33333	15.6667	A/+	E/+	TC	CG	TT
EdX3317	Arabian	15	0	6.66667	21.6667	A/+	e/e	TC	CG	TT
EdX3850	Arabian	1	0	0.666667	1.66667	A/+	E/+	TC	CG	TT
EdX2660	American Quarter Horse	4	0	5.33333	9.33333	A/+	e/e	TC	CG	TT
EdX1684	American Quarter Horse	0	0	0.333333	0.333333	A/+	E/+	TC	CG	TT
EdX1033	Warmblood	0.333333	0	1	1.33333	A/+	E/+	TC	CG	TT
EdX4667	Arabian	9.33333	1	7	17.3333	A/+	e/e	TC	CG	TT
EdX4984	Arabian	12.3333	0	3.66667	16	A/+	E/+	TC	CG	TT
EdX3282	Arabian	9.66667	0	6.33333	16	A/+	e/e	TC	CC	TT
EdX4477	Rocky Mountain Horse	0	0	2.33333	2.33333	a/a	E/+	TC	CG	TT
EdX1024	Arabian	2.33333	0	0.333333	2.66667	A/+	E/+	TC	CG	TT
EdX2308	American Paint Horse	0	0	0	0	a/a	E/+	TC	CG	TT
EdX2829	Arabian	15.3333	0	5.33333	20.6667	A/+	e/e	TC	CC	TT
EdX4739	Arabian	17.3333	1	5.66667	24	A/+	e/e	TC	CC	TT
EdX3272	Mangalarga Marchador	1	0	1	2	A/+	E/+	TC	GG	TT
EdX4884	Arabian	3	0	1.33333	4.33333	A/+	E/+	TC	CC	TT
EdX3957	Mangalarga Marchador	1.66667	0	3	4.66667	A/+	e/e	TC	CC	TT
EdX1888	Warmblood	6	0	2.33333	8.33333	A/+	E/+	TC	CG	TT
EdX4629	Mangalarga	19.3333	2	5.66667	27	A/+	e/e	TC	GG	TT
EdX4400	Arabian	20	2	9.33333	31.3333	A/+	e/e	CC	CG	TC
EdX4806	Arabian	20	2	8.66667	30.6667	A/+	E/+	TC	CC	TC
EdX1144	Arabian	20	2	10	32	A/+	e/e	TC	CG	TC
EdX2672	Arabian	14.6667	0	6.66667	21.3333	A/+	E/+	TC	CC	TC
EdX3952	Arabian	20	1.66667	7.66667	29.3333	a/a	E/+	TC	CC	TC
EdX3114	Arabian	20	2	8.66667	30.6667	a/a	E/+	TC	CG	TC
EdX3702	Arabian	20	2	9	31	A/+	E/+	TC	CG	TC
EdX3405	Arabian	20	2	8	30	A/+	E/+	TC	CG	TC
EdX2737	Arabian	19.6667	0	6.66667	26.3333	a/a	E/+	TC	CG	TC
EdX2927	Arabian	20	2	11.3333	34.6667	A/+	E/+	CC	CC	CC
EdX1926	Arabian	19.6667	1	7	27.6667	A/+	E/+	CC	CC	TC
EdX3720	Arabian	19.6667	2	9	30.6667	A/+	E/+	TC	CC	TC
EdX3366	Arabian	17.3333	0	8	25.4444	A/+	e/e	TT	CC	TT
EdX3922	Arabian	14.6667	0	4	18.8889	A/+	e/e	TT	CG	TT
EdX1929	Arabian	13.6667	0	6.66667	21.1111	A/+	e/e	TT	CC	TT
EdX1377	Arabian	14.6667	0	3	17.8889	A/+	E/+	TT	CG	TT
EdX3019	Warmblood	14.6667	0	1	15.2222	A/+	e/e	TT	CG	TT
EdX2201	Warmblood	7.66667	0	4	11.5556	A/+	e/e	TT	CC	TT
EdX2605	Arabian	10	0	0	10.3333	a/a	e/e	TT	CC	TT
EdX4171	Arabian	5.33333	0	4.66667	9	a/a	E/+	TT	CC	TT
EdX2938	Warmblood	6	0	3	8.66667	a/a	E/+	TT	CC	TT
EdX1820	American Quarter Horse	0.666667	0	5.33333	5.66667	A/+	e/e	TT	CC	TT
EdX2596	Arabian	4.33333	0	4	7.77778	A/+	e/e	TT	CC	TT
EdX1832	American Quarter Horse	3	0	2	5.33333	A/+	e/e	TT	CC	TT
EdX1431	American Quarter Horse	3.66667	0	1	4.55556	A/+	e/e	TT	GG	TT
EdX1047	American Quarter Horse	1.33333	0	2	3.77778	A/+	e/e	TT	CG	TT
EdX4545	American Quarter Horse	0.666667	0	2.66667	3.11111	A/+	e/e	TT	CC	TT
EdX4779	Arabian	0	0	3.66667	3.88889	a/a	E/+	TT	CG	TT
EdX2658	American Quarter Horse	0.333333	0	3	3.44444	A/+	e/e	TT	CC	TT
EdX2072	American Quarter Horse	0	0	3.33333	3.11111	A/+	e/e	TT	CG	TT
EdX3815	Arabian	0	0	3	3	A/+	e/e	TT	CC	TT
EdX4537	Warmblood	0	0	3	3	A/+	E/+	TT	GG	TT
EdX4379	American Quarter Horse	2	0	1	3	A/+	E/+	TT	CG	TT
EdX2598	American Paint Horse	0	0	1.66667	1.88889	A/+	E/+	TT	GG	TT
EdX2529	American Quarter Horse	0	0	2.33333	2.44444	A/+	E/+	TT	CG	TT
EdX1341	Warmblood	1	0	1	2	A/+	E/+	TT	CC	TT
EdX1030	American Quarter Horse	0	0	1	1	a/a	E/+	TT	CC	TT
EdX4696	American Quarter Horse	0	0	1	1	a/a	E/+	TT	CC	TT
EdX3059	American Quarter Horse	0	0	1	1	A/+	E/+	TT	CC	TT
EdX3529	Arabian	0	0	1	1	A/+	e/e	TT	CC	TT
EdX4058	American Paint Horse	0	0	1	1	a/a	E/+	TT	CG	TT
EdX2535	Arabian	0	0	1	1	A/+	e/e	TT	CC	TT
EdX3937	American Paint Horse	0	0	1	1	a/a	E/+	TT	CG	TT
EdX4538	American Quarter Horse	0	0	1	1	A/+	e/e	TT	CG	TT
EdX2079	Warmblood	1	0	0	1	A/+	E/+	TT	CC	TT
EdX3075	Appaloosa	1	0	0	1	a/a	E/+	TT	CG	TT
EdX3428	American Paint Horse	0	0	1	1	A/+	e/e	TT	GG	TT
EdX2481	Mangalarga Marchador	1	0	0	1	A/+	E/+	TT	CG	TT
EdX3424	American Quarter Horse	0	0	0	0	A/+	e/e	TT	CG	TT
EdX1510	American Quarter Horse	0	0	0	0	a/a	E/+	TT	CG	TT
EdX4388	American Quarter Horse	0	0	0	0	A/+	e/e	TT	CC	TT
EdX1062	Warmblood	0	0	0	0	A/+	E/+	TT	CG	TT
EdX3676	American Paint Horse	0	0	0	0	a/a	e/e	TT	CG	TT
EdX4254	American Paint Horse	0	0	0	0	A/+	E/+	TT	CG	TT
EdX1647	Arabian	0	0	0	0	A/+	E/+	TT	CG	TT
EdX2682	American Quarter Horse	0	0	0	0	A/+	e/e	TT	CC	TT
EdX1048	American Paint Horse	0	0	0	0	A/+	E/+	TT	CG	TT
EdX4159	Appaloosa	0	0	0	0	a/a	E/+	TT	GG	TT
EdX2140	American Paint Horse	0	0	0	0	a/a	E/+	TT	CC	TT
EdX1457	Arabian	0	0	0	0	a/a	E/+	TT	GG	TT
EdX3635	American Quarter Horse	0	0	0	0	A/+	E/+	TT	CG	TT
EdX4427	American Paint Horse	0	0	0	0	A/+	e/e	TT	CG	TT
EdX2040	Arabian	0	0	0	0	a/a	E/+	TT	CC	TT
EdX2453	Arabian	0	0	0	0	A/+	e/e	TT	GG	TT
EdX2004	American Paint Horse	0	0	0	0	A/+	e/e	TT	CC	TT
EdX3748	Arabian	0	0	0	0	A/+	e/e	TT	CG	TT
EdX4894	Appaloosa	0	0	0	0	a/a	E/+	TT	CG	TT
EdX1611	Arabian	0	0	0	0	A/+	e/e	TT	CC	TT
EdX2303	American Paint Horse	0	0	0	0	A/+	e/e	TT	CC	TT
EdX3984	American Quarter Horse	0	0	0	0	a/a	E/+	TT	CC	TT
EdX3333	American Paint Horse	0	0	0	0	a/a	E/+	TT	CG	TT
EdX1713	American Quarter Horse	0	0	1	1	A/+	E/+	TT	CC	TT
EdX2785	American Quarter Horse	0	0	0	0	a/a	E/+	TT	CG	TT
EdX1138	American Quarter Horse	0	0	0	0	A/+	e/e	TT	CC	TT
EdX4407	Warmblood	0	0	0	0	A/+	E/+	TT	CG	TT
EdX1055	American Quarter Horse	0	0	0	0	A/+	e/e	TT	CC	TT
EdX2984	ArabianX	0	0	0	0	a/a	E/+	TT	CC	TT
EdX3184	American Quarter Horse	0	0	0	0	A/+	E/+	TT	CG	TT
EdX2247	Warmblood	0	0	0	0	A/+	E/+	TT	CC	TT
EdX1582	American Quarter Horse	0	0	0	0	A/+	E/+	TT	CC	TT
EdX3327	American Quarter Horse	0	0	0	0	A/+	E/+	TT	CG	TT
EdX4435	American Quarter Horse	0	0	0	0	A/+	e/e	TT	CG	TT
EdX1325	American Quarter Horse	0	0	0	0	a/a	e/e	TT	CC	TT
EdX3388	Arabian	0	0	0	0	A/+	E/+	TT	CG	TT
EdX1058	Appaloosa	0	0	0	0	a/a	E/+	TT	CC	TT
EdX2057	Appaloosa	0	0	0	0	a/a	E/+	TT	GG	TT
EdX3932	American Quarter Horse	0	0	0	0	A/+	e/e	TT	CG	TT
EdX4780	American Quarter Horse	0	0	0	0	a/a	E/+	TT	CC	TT
EdX2656	American Quarter Horse	0	0	0	0	A/+	e/e	TT	CG	TT
EdX2521	American Quarter Horse	0	0	0	0	A/+	E/+	TT	CG	TT
EdX2195	American Quarter Horse	0	0	0	0	A/+	E/+	TT	CC	TT
EdX3602	American Quarter Horse	0	0	0	0	A/+	e/e	TT	CC	TT
EdX3107	Mangalarga Marchador	0	0	0	0	A/+	E/+	TT	CG	TT
EdX2650	American Quarter Horse	0	0	0	0	A/+	E/+	TT	CG	TT
EdX1812	American Quarter Horse	0	0	0	0	A/+	e/e	TT	CG	TT
EdX1128	American Quarter Horse	0	0	0	0	A/+	E/+	TT	CG	TT
EdX2131	American Paint Horse	0	0	0	0	a/a	E/+	TT	CC	TT
EdX4431	American Quarter Horse	0	0	0	0	A/+	E/+	TT	CC	TT
EdX1996	American Quarter Horse	0	0	0	0	A/+	E/+	TT	CC	TT
EdX1308	American Quarter Horse	0	0	0	0	A/+	E/+	TT	CG	TT
EdX2507	American Quarter Horse	0	0	0	0	A/+	E/+	TT	CC	TT
EdX3861	Warmblood	0	0	0	0	A/+	e/e	TT	CC	TT
EdX1748	Appaloosa	0	0	0	0	A/+	E/+	TT	CG	TT
EdX4965	American Paint Horse	0	0	0	0	A/+	E/+	TT	CC	TT
EdX2504	American Paint Horse	0	0	0	0	A/+	e/e	TT	CC	TT
EdX2150	American Quarter Horse	0	0	0	0	A/+	E/+	TT	GG	TT
