# Supplementary material for: A KIT Variant Associated with Increased White Spotting Epistatic to MC1R Genotype in Horses (Equus caballus)
Source: Animals (Basel). 2022 Aug 2;12(15):1958. doi: 10.3390/ani12151958 (PMC9367399; doi:10.3390/ani12151958)
Supplement: Supplementary file 1 [file animals-12-01958-s001.zip › Table S2.pdf]

**Table S2:** Effect sizes of *MC1R Extension*, *ASIP Agouti*, *KIT W19* and *KIT rs1140732842* loci on AGW (N = 147) using binomial regression.

|                                                                            | <i>AICc</i> | <i>MC1R Extension</i> | <i>ASIP Agouti</i> | <i>KIT W19*</i>        | <i>KIT rs1140732842</i> |
|----------------------------------------------------------------------------|-------------|-----------------------|--------------------|------------------------|-------------------------|
| AGW                                                                        | 1091.26     |                       |                    |                        |                         |
| AGW + <i>MC1R Extension</i>                                                | 1089.85     | 3.49                  |                    |                        |                         |
| AGW + <i>ASIP Agouti</i>                                                   | 1091.13     |                       | 2.20               |                        |                         |
| AGW + <i>KIT W19</i>                                                       | 993.98      |                       |                    | 71.59 *                |                         |
| AGW + <i>KIT rs1140732842</i>                                              | 1018.01     |                       |                    |                        | 49.95                   |
| AGW + <i>MC1R Extension</i> + <i>KIT rs1140732842</i>                      | 1009.46     | 10.78                 |                    |                        | 55.67                   |
| AGW + <i>MC1R Extension</i> + <i>KIT W19</i>                               | 977.54      | 19.27                 |                    | 86.51 *                |                         |
| AGW + <i>MC1R Extension</i> + <i>ASIP Agouti</i>                           | 1090.99     | 2.22                  | 0.95               |                        |                         |
| AGW + <i>MC1R Extension</i> + <i>ASIP Agouti</i> + <i>KIT W19</i>          | 978.24      | 14.69                 | 1.43               | 86.45 *                |                         |
| AGW + <i>MC1R Extension</i> + <i>ASIP Agouti</i> + <i>KIT rs1140732842</i> | 1010.67     | 11.70                 | 0.94               |                        | 55.28                   |
| AGW + 4 loci                                                               | 919.73      | 29.03                 | 0.26               | 63.93*                 | 37.42                   |
| <i>p-value</i> (full model)                                                |             | $2.94 \times 10^{-7}$ | 0.6508             | $1.88 \times 10^{-20}$ | $9.56 \times 10^{-14}$  |

*p*-values are given for the full model incorporating AGW and genetic effects. \* all W19 individuals are also *KIT rs1140732842*
